# Supplementary material for: Completely resolved structural variants by optical genome mapping with adaptive sampling from CNV discovery
Source: Research Square preprint supplement (doi:10.21203/rs.3.rs-7371701/v1), 2025-09-23
Supplement: Supplementary file 1 [file 29c8d27cce18a54fafeacd50.xlsx]

## Sheet: TableS3
Table S3. Gene list in SVs detected using OGM.
Case	Saphyr	OGM
		Cytoband	CNV	Size (bp)	Gene list in SVs	pHaplo score (0.86 or higher )	pTriplo score (0.94 or higher )
1	109	1q21.1-q21.2	Deletion	2542691	NBPF10, NOTCH2NL, PPIAL4H, NBPF12, PRKAB2, FMO5, CHD1L, BCL9, LOC12807, ACP6, GJA5, GJA8, GPR89B, NBPF11, PPIAL4G, NBPF14	None	-
2	110	4pter-4p16.3	Deletion	1196612	ZNF595, ZNF718, ZNF732, ZNF141, ZNF721, PIGG, TMEM271, PDE6B, ATP5ME, MYL5, SLC49A3, PCGF3, CPLX1, GAK, TMEM175, DGKQ, IDUA, SLC26A1, FGFRL1, RNF212, SPON2	PCGF3 (0.875), GAK (0.922), PDE6B (0.888), IDUA (0.866), FGFRL1 (0.874), CPLX1 (0.948)	-
3	111	8q23.3-q24.21	Deletion	10034669	EIF3H, UTP23, RAD21, AARD, SLC30A8, MED30, EXT1, SAMD12, TNFRSF11, COLEC10, MAL2, CCN3, ENPP2, TAF2, DSCC1, DEPTOR, COL14A1, MRPL13, MTBP, SNTB1, HAS2, ZHX2, DERL1, TBC1D31, FAM83A, C8orf76, ZHX1, ATAD2, NTAQ1, FBXO32, KLHL38, ANXA13, FAM91A1, FER1L6, TMEM65, TRMT12, RNF139, TATDN1, NDUFB9, MTSS1, ZNF572, SQLE, WASHC5, NSMCE2, TRIB1	MTSS1 (0.990), ATAD2 (0.984), RAD21 (0.992), RNF139 (0.861), EXT1 (0.992), ZHX1 (0.890), TRIB1 (0.968), ENPP2 (0.861), FBXO32 (0.954), SQLE (0.951), MRPL13 (0.872), HAS2 (0.977), COL14A1 (0.879)	-
4	112	22q11.21	Deletion	2323551	DGCR6, PRODH, FAM246C, DGCR2, ESS2, TSSK2, GSC2, SLC25A1, CLTCL1, HIRA, MRPL40, C22orf39, UFD1, CDC45, CLDN5, SEPTIN5, GP1BB, TBX1, GNB1L, RTL10, TXNRD2, COMT, ARVCF, TANGO2, DGCR8, TRMT2A, RANBP1, ZDHHC8, CCDC188, RTN4R, DGCR6L, ZNF74, SCARF2, KLHL22, MED15, PI4KA, SERPIND1, SNAP29, CRKL, AIFM3, LZTR1, THAP7, P2RX6, SLC7A4, LRRC74B	HIRA (0.916), SCARF2 (0.949)	-
5	115	15q13.2-q13.3	Deletion	1989617	GOLGA8Q, GOLGA8H, ARHGAP11, FAN1, MTMR10, TRPM1, KLF13, OTUD7A, CHRNA7, GOLGA8K	None	-
6	116	21q22.2-q22.3	Duplication	2195417	BRWD1, HMGN1, GET1, LCA5L, SH3BGR, B3GALT5, IGSF5, PCP4, DSCAM, BACE2, FAM3B, MX2, MX1	-	None
7	117	8p23.1	Duplication	1622147	MSRA, PRSS55, RP1L1, C8orf74, SOX7, PINX1, XKR6, MTMR9, SLC35G5, FAM167A, BLK, GATA4, NEIL2, FDFT1, CTSB, DEFB136, DEFB135	-	None
8	118	7q11.22-q21.12	Deletion	15269269	CALN1, TYW1B, POM121, TRIM74, SPDYE8, SPDYE11, SPDYE9, SPDYE10, NSUN5, TRIM50, FKBP6, FZD9, BAZ1B, BCL7B, TBL2, MLXIPL, VPS37D, DNAJC30, BUD23, STX1A, ABHD11, CLDN3, CLDN4, METTL27, TMEM270, ELN, LIMK1, EIF4H, LAT2, RFC2, CLIP2, GTF2IRD1, GTF2I, NCF1, GTF2IRD2, SPDYE12, CASTOR2, RCC1L, GTF2IRD2, SPDYE13, SPDYE14, SPDYE15, TRIM73, POM121C, SPDYE5, HIP1, CCL26, CCL24, RHBDD2, POR, TMEM120A, STYXL1,…	BAZ1B (0.986), MAGI2 (0.976), GTF2IRD1 (0.949), HGF (0.881), PTPN12 (0.933), DMTF1 (0.886), PCLO (0.862)	-
9	119	6q12-q14.1	Deletion	14804813	ADGRB3, LOC12789, LMBRD1, COL19A1, COL9A1, FAM135A, SDHAF4, SMAP1, B3GAT2, OGFRL1, RIMS1, KCNQ5, KHDC1L, KHDC1, DPPA5, KHDC3L, OOEP, DDX43, CGAS, MTO1, EEF1A1, SLC17A5, CD109, COL12A1, COX7A2, TMEM30A, FILIP1, SENP6, MYO6, IMPG1, HTR1B, MEI4, IRAK1BP1, PHIP, HMGN3, LCA5, SH3BGRL2, ELOVL4, TTK, BCKDHB	PHIP (0.995), COL12A1 (0.995), SENP6 (0.931)	-
10	120	17p13.3	Deletion	1448734	NXN, TIMM22, ABR, BHLHA9, TRARG1, YWHAE, CRK, MYO1C, INPP5K, PITPNA, SLC43A2, SCARF1, RILP, PRPF8, TLCD2, WDR81, SERPINF2, SERPINF1, SMYD4, RPA1, RTN4RL1, DPH1, OVCA2, HIC1, SMG6, SRR, TSR1, SGSM2, MNT	PRPF8 (0.985), CRK (0.973), RTN4RL1 (0.989), SMG6 (0.985), RPA1 (0.938), HIC1 (0.958), PITPNA (0.957), NXN (0.996), YWHAE (0.965), ABR (0.910), MNT (0.948), SRR (0.862), BHLHA9 (0.862)	-
11	121	Xp22.31	Deletion	1697429	VCX3A, PUDP, STS, VCX, PNPLA4	None	-
12	122	2q32.1-q33.2	Deletion	18069129	FSIP2, ZC3H15, ITGAV, FAM171B, ZSWIM2, CALCRL, TFPI, GULP1, COL3A1, COL5A2, WDR75, SLC40A1, ASNSD1, ASDURF, ANKAR, OSGEPL1, ORMDL1, PMS1, MSTN, C2orf88, HIBCH, INPP1, MFSD6, NEMP2, NAB1, GLS, STAT1, STAT4, MYO1B, NABP1, CAVIN2, TMEFF2, SLC39A10, DNAH7, STK17B, HECW2, CCDC150, GTF3C3, C2orf66, PGAP1, ANKRD44, SF3B1, COQ10B, HSPD1, HSPE1, MOB4, RFTN2, MARS2, BOLL, PLCL1, SATB2, FTCDNL1, C2orf69, TY…	SF3B1 (0.998), HECW2 (0.988), SATB2 (0.998), STAT1 (0.974), HSPD1 (0.973), BMPR2 (0.975), BZW1 (0.956), GLS (0.947), MYO1B (0.923), SUMO1 (0.900), ORC2 (0.933), ABI2 (0.893), ZC3H15 (0.861), SLC40A1 (0.959), COL3A1 (0.960), SPATS2L (0.899), SLC39A10 (0.940), COL5A2 (0.950)	-
13	123	16p13.12-p13.11	Deletion	1691831	PLA2G10, NPIPA3, NPIPA2, NOMO1, NPIPA1, PDXDC1, NTAN1, RRN3, NPIPA5, MPV17L, BMERB1, MARF1, NDE1, MYH11, CEP20, ABCC1, ABCC6, NOMO3, NPIPA6	MYH11 (0.959)	-
14	124	19p13.2-p13.13	Deletion	1998070	ELAVL3, ZNF653, ECSIT, CNN1, ELOF1, ACP5, ZNF627, ZNF823, ZNF441, ZNF491, ZNF440, ZNF439, ZNF69, ZNF700, ZNF763, ZNF433, ZNF878, ZNF844, ZNF20, ZNF625, ZNF136, ZNF44, ZNF563, ZNF442, ZNF799, ZNF443, ZNF709, ZNF564, ZNF490, ZNF791, MAN2B1, WDR83, WDR83OS, DHPS, GNG14, FBXW9, TNPO2, TRIR, GET3, BEST2, HOOK2, JUNB, PRDX2, THSD8, RNASEH2A, RTBDN, MAST1, DNASE2, KLF1, GCDH, SYCE2, FARSA, CALR, RAD23A,…	CACNA1A (0.995), NFIX (0.989), MAST1 (0.911), TNPO2 (0.870), NACC1 (0.864)	-
15	125	17p13.3–p13.2	Duplication	3769001	SCGB1C2, DOC2B, RPH3AL, LIAT1, RFLNB, VPS53, TLCD3A, GEMIN4, GLOD4, MRM3, NXN, TIMM22, ABR, BHLHA9, TRARG1, YWHAE, CRK, MYO1C, INPP5K, PITPNA, SLC43A2, SCARF1, RILP, PRPF8, TLCD2, WDR81, SERPINF2, SERPINF1, SMYD4, RPA1, RTN4RL1, DPH1, OVCA2, HIC1, SMG6, SRR, TSR1, SGSM2, MNT, METTL16, PAFAH1B1, CLUH, CCDC92B, RAP1GAP2, OR1D5, OR1D2, OR1G1, OR1A2, OR1A1, OR3A2, OR3A1, OR1R1P, OR1E1, OR3A3, OR1E2, …	-	PAFAH1B1 (0.998), CRK (0.997), PRPF8 (0.989), RTN4RL1 (0.957)
		1p36.33–p36.32	Deletion	3521749	OR4F29, OR4F16, SAMD11, NOC2L, KLHL17, PLEKHN1, PERM1, HES4, ISG15, AGRN, RNF223, C1orf159, TTLL10, TNFRSF18, TNFRSF4, SDF4, B3GALT6, C1QTNF12, UBE2J2, SCNN1D, ACAP3, PUSL1, INTS11, CPTP, TAS1R3, DVL1, MXRA8, AURKAIP1, CCNL2, MRPL20, ANKRD65, TMEM88B, VWA1, ATAD3C, ATAD3B, ATAD3A, TMEM240, SSU72, FNDC10, MIB2, MMP23B, CDK11B, SLC35E2B, CDK11A, NADK, GNB1, CALML6, TMEM52, CFAP74, GABRD, PRKCZ, FAA…	GNB1 (0.901), PANK4 (0.903), PRDM16 (0.989)	-
16	133	8q21.13	Deletion	4903335	ZFHX4, PEX2, PKIA, ZC2HC1A, IL7, STMN2, HEY1, MRPS28, TPD52, ZBTB10, ZNF704, PAG1, FABP5, PMP2, FABP9, FABP4	ZBTB10 (0.938), ZFHX4 (0.994)	-
17	134	21q22.2–q22.3	Deletion	6712872	DSCAM, BACE2, FAM3B, MX2, MX1, TMPRSS2, RIPK4, PRDM15, C2CD2, ZBTB21, UMODL1, ABCG1, TFF3, TFF2, TFF1, TMPRSS3, UBASH3A, RSPH1, SLC37A1, PDE9A, WDR4, NDUFV3, ERVH48-1, PKNOX1, CBS, U2AF1, CRYAA, SIK1, HSF2BP, H2BC12L, RRP1B, PDXK, CSTB, RRP1, AGPAT3, TRAPPC10, PWP2, GATD3, ICOSLG, DNMT3L, AIRE, PFKL, CFAP410, TRPM2, LRRC3, TSPEAR, KRTAP10-1, KRTAP10-2, KRTAP10-3, KRTAP10-4, KRTAP10-5, KRTAP10-6, …	U2AF1 (0.990), TRAPPC10 (0.985), DSCAM (0.977), PCBP3 (0.959), BACE2 (0.953), DIP2A (0.947), COL6A1 (0.942), SIK1 (0.929), TMPRSS2 (0.925), RIPK4 (0.917), PKNOX1 (0.896), C2CD2 (0.895), ADARB1 (0.895), PDE9A (0.890), MCM3AP (0.881), AGPAT3 (0.880), CBS (0.879), ICOSLG (0.871), PRDM15 (0.865), RRP1B (0.864)	-
		14q32.13–q32.33	Duplication	9900442	TCL1B, TCL1A, TUNAR, C14orf13, BDKRB2, BDKRB1, ATG2B, GSKIP, AK7, PAPOLA, VRK1, BCL11B, SETD3, CCNK, CCDC85C, HHIPL1, CYP46A1, EML1, EVL, DEGS2, YY1, SLC25A29, SLC25A47, WARS1, WDR25, BEGAIN, DLK1, MEG3, RTL1, DIO3, PPP2R5C, DYNC1H1, HSP90AA1, WDR20, MOK, ZNF839, CINP, TECPR2, ANKRD9, RCOR1, TRAF3, AMN, CDC42BPB, LBHD2, EXOC3L4, TNFAIP2, EIF5, MARK3, CKB, TRMT61A, BAG5, COA8, KLC1, XRCC3, ZFYVE21…	-	DYNC1H1 (1.000), YY1 (1.000), JAG2 (0.998), CEP170B (0.998), CCNK (0.997), CDC42BPB (0.994), RCOR1 (0.994), AKT1 (0.993), MTA1 (0.988), PPP2R5C (0.986), TNFAIP2 (0.981), PAPOLA (0.976), NUDT14 (0.975), DLK1 (0.971), KLC1 (0.971), EXOC3L4 (0.959), TRAF3 (0.956), RD3L (0.950)
18	135	2q24.3	Duplication	1488052	SCN3A, SCN2A, CSRNP3, GALNT3, TTC21B, SCN1A, SCN9A, SCN7A	-	SCN1A (1.000), SCN3A (0.956), SCN2A (0.949)
19	136	19q13.42-q13.43	Deletion	1486096	LENG8, LENG9, CDC42EP5, LAIR2, LILRA2, LILRA1, LILRB1, LILRB4, KIR3DL3, KIR2DL3, KIR2DL1, KIR2DL4, KIR3DL1, KIR3DL2, FCAR, NCR1, NLRP7, NLRP2, GP6, RDH13, EPS8L1, PPP1R12C, TNNT1, TNNI3, DNAAF3, SYT5, PTPRH, TMEM86B, PPP6R1, HSPBP1, BRSK1, TMEM150B, KMT5C, COX6B2, GARIN5B, IL11, TMEM190, TMEM238, RPL28, UBE2S, SHISA7, ISOC2, C19orf85, ZNF628, NAT14, SSC5D, SBK2, SBK3, ZNF579, FIZ1, ZNF524, ZNF865…	U2AF2 (0.955)	-
20	137	Xq21.33–q22.3	Duplication	8397757	PCDH19, TNMD, TSPAN6, SRPX2, SYTL4, CSTF2, NOX1, XKRX, ARL13A, TRMT2B, TMEM35A, CENPI, DRP2, TAF7L, TIMM8A, BTK, RPL36A, GLA, HNRNPH2, ARMCX4, ARMCX1, ARMCX6, ARMCX3, ARMCX2, ZMAT1, TCEAL2, BEX5, TCP11X1, NXF2, NXF2B, TCP11X2, TMSB15A, ARMCX5, GPRASP1, GPRASP2, GPRASP3, RAB40AL, BEX1, NXF3, BEX4, TCEAL8, TCEAL5, BEX2, TCEAL7, TCEAL9, BEX3, RAB40A, TCEAL4, TCEAL3, TCEAL1, MORF4L2, TMEM31, PLP1, RA…	-	None
21	138	Xq22.2	Duplication	438546	TCEAL1, MORF4L2, TMEM31, PLP1, RAB9B, TMSB15B, H2BW1, H2BW2	-	None
22	139	18p11.32–p11.22	Duplication	10753672	TUBB8B, USP14, THOC1, COLEC12, CETN1, CLUL1, TYMS, ENOSF1, YES1, ADCYAP1, METTL4, NDC80, SMCHD1, EMILIN2, LPIN2, MYOM1, MYL12A, MYL12B, TGIF1, DLGAP1, AKAIN1, ZBTB14, EPB41L3, TMEM200C, L3MBTL4, ARHGAP28, LAMA1, LRRC30, PTPRM, RAB12, MTCL1, NDUFV2, ANKRD12, TWSG1, RALBP1, PPP4R1, RAB31, TXNDC2, VAPA, APCDD1, NAPG, PIEZO2	-	SMCHD1 (0.971)
		18q21.31–21.33	Duplication	2778132	ALPK2, MALT1, ZNF532, SEC11C, GRP, RAX, CPLX4, LMAN1, CCBE1, PMAIP1, MC4R, CDH20	-	None
		18q21.33–q23	Deletion	18879941	CDH20, RNF152, PIGN, RELCH, TNFRSF11A, ZCCHC2, PHLPP1, BCL2, KDSR, VPS4B, SERPINB5, SERPINB12, SERPINB13, SERPINB4, SERPINB3, SERPINB11, SERPINB7, SERPINB2, SERPINB10, HMSD, SERPINB8, LINC00305, CDH7, CDH19, DSEL, TMX3, CCDC102B, DOK6, CD226, RTTN, SOCS6, CBLN2, NETO1, FBXO15, TIMM21, CYB5A, C18orf63, DIPK1C, CNDP2, CNDP1, ZNF407, PTGR3, TSHZ1, SMIM21, ZNF516, ZNF236, MBP, GALR1, SALL3, ATP9B, NF…	ZNF516 (0.998), ZNF236 (0.998), SALL3 (0.996), PARD6G (0.992), ADNP2 (0.992), NFATC1 (0.991), ZNF407 (0.985), PHLPP1 (0.982), MBP (0.977), GALR1 (0.973), CYB5A (0.966), ZCCHC2 (0.965), TSHZ1 (0.964), SOCS6 (0.963), RBFA (0.961), TXNL4A (0.959), KCNG2 (0.958), HSBP1L1 (0.952), FBXO15 (0.941), ATP9B (0.929), BCL2 (0.928), TIMM21 (0.896), VPS4B (0.888), TNFRSF11A (0.874), NETO1 (0.866), CNDP1 (0.866)	-
23	140	9p24.3-p22.3	Deletion	14310848	WASHC1, FOXD4, ZNG1A, DOCK8, KANK1, DMRT1, DMRT3, DMRT2, SMARCA2, VLDLR, KCNV2, PUM3, RFX3, GLIS3, SLC1A1, SPATA6L, PLPP6, CDC37L1, AK3, RCL1, JAK2, INSL6, INSL4, RLN2, RLN1, PLGRKT, CD274, PDCD1LG2, RIC1, ERMP1, MLANA, BRD10, RANBP6, IL33, TPD52L3, UHRF2, GLDC, KDM4C, DMAC1, PTPRD, TYRP1, LURAP1L, MPDZ, NFIB, NFIB-AS1	SMARCA2 (0.999), NFIB (0.999), RFX3 (0.997), UHRF2 (0.995), PTPRD (0.993), DMRT1 (0.993), DMRT3 (0.992), DMRT2 (0.991), CDC37L1 (0.991), DOCK8 (0.989), JAK2 (0.987), VLDLR (0.982), AK3 (0.945), RCL1 (0.938), GLIS3 (0.928), SLC1A1 (0.927), KDM4C (0.915), CD274 (0.909), ERMP1 (0.862)
		9p22.3	Duplication	851085	ZDHHC21, CER1, FREM1, TTC39B	-	None
24	141	19q13.33	Duplication	606293	PPFIA3, HRC, TRPM4, SLC6A16, CD37, TEAD2, DKKL1, KASH5, PTH2, GFY, SLC17A7, PIH1D1, ALDH16A1, FLT3LG, RPL13A, RPS11, FCGRT, RCN3, NOSIP, PRRG2, PRR12, RRAS, SCAF1, IRF3, BCL2L12, PRMT1, ADM5, CPT1C	-	PRMT1 (1.000), PRR12 (0.999), SLC17A7 (0.969), SCAF1 (0.959)
25	142	1p22.1-p13.2	Deletion	18220941	MTF2, TMED5, CCDC18, DR1, FNBP1L, BCAR3, DNTTIP2, GCLM, ABCA4, ARHGAP29, ABCD3, F3, SLC44A3, CNN3, ALG14, TLCD4, RWDD3, PTBP2, DPYD, SNX7, PLPPR5, PLPPR4, PALMD, FRRS1, AGL, SLC35A3, MFSD14A, SASS6, TRMT13, LRRC39, DBT, RTCA, CDC14A, GPR88, VCAM1, EXTL2, SLC30A7, DPH5, S1PR1, OLFM3, COL11A1, RNPC3, AMY2B, AMY2A, AMY1A, AMY1B, AMY1C, PRMT6, NTNG1, VAV3, SLC25A24, NBPF4, NBPF6, EEIG2, HENMT1, PRPF3…	MTF2 (0.935), PTBP2 (0.913), NTNG1 (0.865), CNN3 (0.869), ARHGAP29 (0.925), COL11A1 (0.894)	-
26	143	5p15.33–p15.32	Duplication	4596714	PLEKHG4B, LRRC14B, CCDC127, SDHA, PDCD6, AHRR, EXOC3, SLC9A3, CEP72, TPPP, ZDHHC11B, ZDHHC11, BRD9, TRIP13, NKD2, SLC12A7, SLC6A19, SLC6A18, TERT, CLPTM1L, SLC6A3, LPCAT1, MRPL36, NDUFS6, IRX4, IRX2, IRX1	-	IRX2 (1.000), IRX1 (0.999)
		18q22.3–q23	Deletion	7373718	FBXO15, TIMM21, CYB5A, C18orf63, DIPK1C, CNDP2, CNDP1, ZNF407, PTGR3, TSHZ1, SMIM21, ZNF516, ZNF236, MBP, GALR1, SALL3, ATP9B, NFATC1, CTDP1, KCNG2, SLC66A2, HSBP1L1, TXNL4A, RBFA, ADNP2, PARD6G	ZNF516 (0.998), ZNF236 (0.998), SALL3 (0.996), PARD6G (0.992), ADNP2 (0.992), NFATC1 (0.991), ZNF407 (0.985), MBP (0.977), GALR1 (0.973), CYB5A (0.966), TSHZ1 (0.964), RBFA (0.961), TXNL4A (0.959), KCNG2 (0.958), HSBP1L1 (0.952), FBXO15 (0.941), ATP9B (0.929), TIMM21 (0.896), CNDP1 (0.866)	-
27	144	9p24.3-p22.1	Deletion	18545327	WASHC1, FOXD4, ZNG1A, DOCK8, KANK1, DMRT1, DMRT3, DMRT2, SMARCA2, VLDLR, KCNV2, PUM3, RFX3, GLIS3, SLC1A1, SPATA6L, PLPP6, CDC37L1, AK3, RCL1, JAK2, INSL6, INSL4, RLN2, RLN1, PLGRKT, CD274, PDCD1LG2, RIC1, ERMP1, MLANA, BRD10, RANBP6, IL33, TPD52L3, UHRF2, GLDC, KDM4C, DMAC1, PTPRD, TYRP1, LURAP1L, MPDZ, NFIB, NFIB-AS, ZDHHC21, CER1, FREM1, TTC39B, SNAPC3, PSIP1, CCDC171, BNC2, CNTLN, SH3GL2, ADA…	SMARCA2 (0.999), NFIB (0.999), RFX3 (0.997), BNC2 (0.996), UHRF2 (0.995), PTPRD (0.993), DMRT1 (0.993), DMRT3 (0.992), DMRT2 (0.991), CDC37L1 (0.991), DOCK8 (0.989), JAK2 (0.987), VLDLR (0.982), PSIP1 (0.976), AK3 (0.945), RCL1 (0.938), GLIS3 (0.928), SLC1A1 (0.927), KDM4C (0.915), CD274 (0.909), ERMP1 (0.862)	-
		9p22.1-p21.2	Duplication	7295797	ADAMTSL1, SAXO1, RRAGA, HAUS6, PLIN2, DENND4C, RPS6, ACER2, SLC24A2, MLLT3, FOCAD, HACD4, IFNB1, IFNW1, IFNA21, IFNA4, IFNA7, IFNA10, IFNA16, IFNA17, IFNA14, IFNA5, KLHL9, IFNA6, IFNA13, IFNA2, IFNA8, IFNA1, IFNE, MTAP, CDKN2A, CDKN2B-A, CDKN2B, DMRTA1, ELAVL2, IZUMO3, TUSC1	-	MLLT3 (0.942)
28	145	2q36.3-q37.3	Duplication	12788940	NYAP2, IRS1, RHBDD1, COL4A4, COL4A3, MFF, TM4SF20, SCYGR1, AGFG1, SCYGR2, SCYGR3, SCYGR4, SCYGR5, SLC19A3, SCYGR6, SCYGR7, SCYGR8, CCL20, DAW1, SPHKAP, PID1, DNER, TRIP12, FBXO36, SLC16A14, SP110, SP140, SP140L, SP100, CAB39, ITM2C, GPR55, SPATA3, C2orf72, PSMD1, HTR2B, ARMC9, B3GNT7, NCL, NMUR1, TEX44, PTMA, PDE6D, COPS7B, NPPC, DIS3L2, ALPP, ALPG, ALPI, ECEL1, PRSS56, CHRND, CHRNG, TIGD1, EIF4E…	-	GBX2 (1.000), PSMD1 (0.967), EIF4E2 (0.979),CAB39 (0.956)
29	147	12q21.1–q21.2	Deletion	5227459	TRHDE, ATXN7L3B, KCNC2, CAPS2, GLIPR1L1, GLIPR1L2, GLIPR1, KRR1, PHLDA1, NAP1L1, BBS10, OSBPL8, ZDHHC17, CSRP2, E2F7	NAP1L1 (0.977), E2F7 (0.919), ZDHHC17 (0.908)	-
30	14	22q11.21	Duplication	389534	FAM246A, RIMBP3B, HIC2, TMEM191C, RIMBP3C, UBE2L3	-	UBE2L3 (1.000), HIC2 (0.942)
		22q12.1-q12.2	Duplication	378649	ZNRF3, C22orf31, KREMEN1, EMID1, RHBDD3, EWSR1, GAS2L1, RASL10A, AP1B1	-	EWSR1 (0.995), AP1B1 (0.995)
		22q12.2	Duplication	437474	LIMK2, PIK3IP1, PATZ1, DRG1, EIF4ENIF, SFI1, PISD	-	PATZ1 (1.000), DRG1 (0.964)
		22q12.3	Duplication	238251	RASD2, MB, APOL6, APOL5	-	None
		22q12.3-q13.1	Duplication	1072545	MPST, KCTD17, TMPRSS6, IL2RB, C1QTNF6, SSTR3, RAC2, CYTH4, ELFN2, MFNG, CARD10, CDC42EP1, LGALS2, GGA1, SH3BP1, PDXP, LGALS1, NOL12, TRIOBP, H1-0, GCAT, GALR3, ANKRD54, EIF3L, MICALL1, C22orf23, POLR2F, SOX10, PICK1, SLC16A8, BAIAP2L2	-	SOX10 (1.000)
		22q13.1	Duplication	643496	BAIAP2L2, PLA2G6, MAFF, TMEM184B, CSNK1E, KCNJ4, KDELR3, DDX17, DMC1, FAM227A, CBY1, TOMM22, JOSD1, GTPBP1, SUN2	-	CSNK1E (0.998), DDX17 (0.996), GTPBP1 (0.973), KCNJ4 (0.956)
		22q13.1	Duplication	597641	DNAL4, NPTXR, CBX6, APOBEC3A, APOBEC3B, APOBEC3C, APOBEC3D, APOBEC3F, APOBEC3G, APOBEC3H, CBX7, PDGFB, RPL3, SYNGR1	-	None
		22q13.31	Duplication	662683	KIAA0930, UPK3A, FAM118A, SMC1B, RIBC2, FBLN1, ATXN10	-	None
pHaplo scores ≥ 0.86 indicate an odds ratio ≥ 2.7. pTriplo scores ≥ 0.94 indicate an odds ratio ≥ 2.7 (Karczewski et al., 2020).
CNV, copy number variant; OGM, optical genome mapping; SV, structural variant. Genes with copy number aberrations identified by OGM associated with clinical features in respective cases are colored in red, and ones previously identified by ES are underlined.
